# Supplementary material for: Where the Head Meets the Heart: ‘Enlightened’ Compassion Lies Between Big Five Openness/Intellect and Agreeableness
Source: Oxford University Press journal article supplement (doi:10.1525/collabra.74468), 2023-01-01
Supplement: collabra_2023_9_1_74468_156673.docx [file collabra_2023_9_1_74468_156673.docx]

**Supplementary File**

[Descriptive Statistics 2](#_Toc116145409)

[Sample A 2](#_Toc116145410)

[Sample B 3](#_Toc116145411)

[Sample C 4](#_Toc116145412)

[Sample D 5](#_Toc116145413)

[Sample E 6](#_Toc116145414)

[Sample F 7](#_Toc116145415)

[Sample G 8](#_Toc116145416)

[Power Analyses 9](#_Toc116145417)

[Sample A 9](#_Toc116145418)

[Sample B 9](#_Toc116145419)

[Sample C 9](#_Toc116145420)

[Sample D 9](#_Toc116145421)

[Sample E 10](#_Toc116145422)

[Sample F 10](#_Toc116145423)

[Sample G 10](#_Toc116145424)

[Study 1 11](#_Toc116145425)

[Divergence from Non-Focal B5 Aspects 11](#_Toc116145426)

[Convergence with BFI-2 and HEXACO-100 Traits 12](#_Toc116145427)

[Study 2 14](#_Toc116145428)

[Additional Correlates of Enlightened Compassion: Established Scales 14](#_Toc116145429)

[Additional Correlates of Enlightened Compassion: Novel Items 15](#_Toc116145430)

[Unique Links between B5 Aspects and Correlates of Enlightened Compassion 19](#_Toc116145431)

[Study 3 20](#_Toc116145432)

[NPCD Task: Associations Among Charitable Causes 20](#_Toc116145433)

[NPCD Task: Associations with Individual Charitable Causes 23](#_Toc116145434)

[NPCD Task: Analyses for Compassion and Openness 24](#_Toc116145435)

[NPCD Task: Pilot Version 26](#_Toc116145436)

[Appendix A 29](#_Toc116145437)

[Enthusiasm 29](#_Toc116145438)

[References 30](#_Toc116145439)

Descriptive Statistics

Sample A

| **Scale** | **Alpha** | **Mean** | ***SD*** | **Median** | **Min** | **Max** |
| --- | --- | --- | --- | --- | --- | --- |
| **EC Scale** |  |  |  |  |  |  |
| *Enlightened Compassion* | .85 | 3.85 | 0.64 | 3.92 | 1.58 | 5.00 |
| **BFAS** |  |  |  |  |  |  |
| *Agreeableness* | .87 | 3.87 | 0.50 | 3.90 | 1.3 | 4.95 |
| Compassion | .88 | 3.93 | 0.62 | 4.00 | 1.1 | 5.00 |
| Politeness | .77 | 3.81 | 0.57 | 3.90 | 1.5 | 5.00 |
| *Openness/Intellect* | .83 | 3.85 | 0.47 | 3.85 | 2.2 | 5.00 |
| Openness | .77 | 3.83 | 0.58 | 3.80 | 1.9 | 5.00 |
| Intellect | .81 | 3.87 | 0.57 | 3.90 | 1.1 | 5.00 |
| *Extraversion* | .88 | 3.42 | 0.57 | 3.45 | 1.2 | 4.80 |
| Enthusiasm | .83 | 3.39 | 0.66 | 3.40 | 1.2 | 5.00 |
| Assertiveness | .87 | 3.44 | 0.69 | 3.50 | 1.0 | 5.00 |
| *Neuroticism* | .92 | 2.91 | 0.71 | 2.90 | 1.0 | 4.75 |
| Withdrawal | .86 | 3.01 | 0.76 | 3.00 | 1.0 | 4.90 |
| Volatility | .91 | 2.81 | 0.81 | 2.70 | 1.0 | 5.00 |
| *Conscientiousness* | .86 | 3.45 | 0.54 | 3.45 | 1.9 | 5.00 |
| Industriousness | .84 | 3.35 | 0.66 | 3.40 | 1.4 | 5.00 |
| Orderliness | .77 | 3.55 | 0.60 | 3.50 | 1.9 | 5.00 |
| **MII** |  |  |  |  |  |  |
| *Moral Imagination* | .90 | 125.96 | 20.23 | 126.00 | 42.00 | 187.00 |
| **MES** |  |  |  |  |  |  |
| *Moral Expansiveness* | .94 | 45.03 | 14.45 | 44.00 | 7.00 | 90.00 |

Sample B

| **Scale** | **Alpha** | **Mean** | ***SD*** | **Median** | **Min** | **Max** |
| --- | --- | --- | --- | --- | --- | --- |
| **EC Scale** |  |  |  |  |  |  |
| *Enlightened Compassion* | .80 | 3.76 | 0.54 | 3.75 | 1.50 | 5.00 |
| **BFAS** |  |  |  |  |  |  |
| *Agreeableness* | .84 | 3.79 | 0.45 | 3.80 | 2.25 | 5.00 |
| Compassion | .86 | 3.87 | 0.54 | 3.90 | 1.80 | 5.00 |
| Politeness | .74 | 3.70 | 0.53 | 3.70 | 2.10 | 5.00 |
| *Openness/Intellect* | .83 | 3.54 | 0.49 | 3.50 | 2.15 | 4.85 |
| Openness | .78 | 3.68 | 0.57 | 3.70 | 2.20 | 5.00 |
| Intellect | .84 | 3.39 | 0.64 | 3.40 | 1.40 | 5.00 |
| *Extraversion* | .89 | 3.30 | 0.55 | 3.30 | 1.50 | 4.75 |
| Enthusiasm | .86 | 3.45 | 0.65 | 3.50 | 1.50 | 4.90 |
| Assertiveness | .87 | 3.15 | 0.65 | 3.20 | 1.30 | 5.00 |
| *Neuroticism* | .92 | 3.01 | 0.66 | 2.95 | 1.30 | 5.00 |
| Withdrawal | .85 | 3.13 | 0.70 | 3.10 | 1.10 | 5.00 |
| Volatility | .90 | 2.88 | 0.76 | 2.80 | 1.00 | 5.00 |
| *Conscientiousness* | .86 | 3.18 | 0.52 | 3.15 | 1.50 | 4.45 |
| Industriousness | .85 | 2.99 | 0.65 | 3.00 | 1.20 | 4.80 |
| Orderliness | .80 | 3.36 | 0.59 | 3.40 | 1.50 | 5.00 |
| **MII** |  |  |  |  |  |  |
| *Moral Imagination* | .89 | 128.97 | 17.16 | 129.00 | 55.00 | 187.00 |

Sample C

| **Scale** | **Alpha** | **Mean** | ***SD*** | **Median** | **Min** | **Max** |
| --- | --- | --- | --- | --- | --- | --- |
| **EC Scale** |  |  |  |  |  |  |
| *Enlightened Compassion* | .86 | 3.91 | 0.68 | 4.00 | 1.08 | 5.00 |
| **BFAS** |  |  |  |  |  |  |
| *Agreeableness* | .88 | 4.00 | 0.52 | 4.05 | 2.10 | 5.00 |
| Compassion | .91 | 4.00 | 0.68 | 4.00 | 1.00 | 5.00 |
| Politeness | .72 | 4.00 | 0.52 | 4.05 | 2.40 | 5.00 |
| *Openness/Intellect* | .89 | 3.90 | 0.57 | 3.90 | 1.95 | 5.00 |
| Openness | .83 | 3.90 | 0.65 | 3.95 | 1.20 | 5.00 |
| Intellect | .88 | 3.90 | 0.67 | 3.90 | 1.60 | 5.00 |
| *Extraversion* | .92 | 3.36 | 0.71 | 3.40 | 1.30 | 5.00 |
| Enthusiasm | .88 | 3.44 | 0.78 | 3.50 | 1.00 | 5.00 |
| Assertiveness | .90 | 3.29 | 0.85 | 3.40 | 1.00 | 5.00 |
| *Neuroticism* | .94 | 2.58 | 0.80 | 2.50 | 1.00 | 5.00 |
| Withdrawal | .90 | 2.73 | 0.89 | 2.60 | 1.00 | 5.00 |
| Volatility | .91 | 2.44 | 0.83 | 2.30 | 1.00 | 5.00 |
| *Conscientiousness* | .90 | 3.67 | 0.62 | 3.70 | 2.10 | 5.00 |
| Industriousness | .89 | 3.68 | 0.74 | 3.70 | 1.10 | 5.00 |
| Orderliness | .83 | 3.65 | 0.67 | 3.70 | 2.00 | 5.00 |
| **MII** |  |  |  |  |  |  |
| *Moral Imagination* | .92 | 127.28 | 22.36 | 127.00 | 44.00 | 183.00 |
| **MES** |  |  |  |  |  |  |
| *Moral Expansiveness* | .94 | 43.83 | 14.65 | 42.00 | 10.00 | 90.00 |

Sample D

| **Scale** | **Alpha** | **Mean** | ***SD*** | **Median** | **Min** | **Max** |
| --- | --- | --- | --- | --- | --- | --- |
| **EC Scale** |  |  |  |  |  |  |
| *Enlightened Compassion* | .84 | 3.80 | 0.56 | 3.83 | 2.00 | 5.00 |
| **BFAS** |  |  |  |  |  |  |
| *Agreeableness* | .84 | 3.82 | 0.45 | 3.80 | 2.20 | 4.80 |
| Compassion | .83 | 3.92 | 0.50 | 3.90 | 2.10 | 5.00 |
| Politeness | .75 | 3.73 | 0.54 | 3.70 | 2.20 | 4.70 |
| *Openness/Intellect* | .83 | 3.56 | 0.48 | 3.55 | 2.30 | 4.90 |
| Openness | .77 | 3.71 | 0.57 | 3.70 | 1.50 | 5.00 |
| Intellect | .85 | 3.41 | 0.63 | 3.40 | 1.40 | 5.00 |
| *Extraversion* | .89 | 3.29 | 0.56 | 3.30 | 1.75 | 4.85 |
| Enthusiasm | .86 | 3.45 | 0.64 | 3.50 | 1.80 | 4.90 |
| Assertiveness | .88 | 3.12 | 0.67 | 3.10 | 1.50 | 4.80 |
| *Neuroticism* | .91 | 3.08 | 0.63 | 2.95 | 1.75 | 4.70 |
| Withdrawal | .83 | 3.26 | 0.66 | 3.20 | 1.10 | 4.70 |
| Volatility | .89 | 2.89 | 0.74 | 2.80 | 1.30 | 4.70 |
| *Conscientiousness* | .88 | 3.16 | 0.56 | 3.25 | 1.40 | 4.55 |
| Industriousness | .85 | 2.95 | 0.64 | 3.00 | 1.50 | 4.70 |
| Orderliness | .82 | 3.37 | 0.66 | 3.40 | 1.20 | 5.00 |
| **PVQ-5X** |  |  |  |  |  |  |
| *Universalism* | .82 | 4.59 | 0.74 | 4.62 | 2.25 | 6.00 |
| **SDO7** |  |  |  |  |  |  |
| *Social Egalitarianism (Reversed)* | .88 | 2.63 | 0.96 | 2.56 | 1.00 | 4.88 |
| **Speciesism Scale** |  |  |  |  |  |  |
| *Species Egalitarianism (Reversed)* | .79 | 2.59 | 1.06 | 2.50 | 1.00 | 6.33 |
| **NEP** |  |  |  |  |  |  |
| *Ecological Egalitarianism* | .76 | 3.73 | 0.48 | 3.73 | 2.60 | 4.87 |

Sample E

| **Scale** | **Alpha** | **Mean** | ***SD*** | **Median** | **Min** | **Max** |
| --- | --- | --- | --- | --- | --- | --- |
| **EC Scale** |  |  |  |  |  |  |
| *Enlightened Compassion* | .83 | 3.76 | 0.58 | 3.75 | 1.92 | 5.00 |
| **BFAS** |  |  |  |  |  |  |
| *Agreeableness* | .86 | 3.85 | 0.47 | 3.85 | 1.95 | 4.90 |
| Compassion | .87 | 3.94 | 0.57 | 4.00 | 1.60 | 5.00 |
| Politeness | .74 | 3.75 | 0.52 | 3.80 | 2.00 | 4.80 |
| *Openness/Intellect* | .80 | 3.57 | 0.43 | 3.55 | 2.60 | 4.70 |
| Openness | .79 | 3.75 | 0.58 | 3.70 | 2.30 | 5.00 |
| Intellect | .72 | 3.39 | 0.49 | 3.40 | 2.10 | 4.60 |
| *Extraversion* | .87 | 3.37 | 0.52 | 3.40 | 2.00 | 4.65 |
| Enthusiasm | .84 | 3.55 | 0.61 | 3.60 | 2.10 | 5.00 |
| Assertiveness | .84 | 3.19 | 0.60 | 3.20 | 1.60 | 4.80 |
| *Neuroticism* | .90 | 3.09 | 0.61 | 3.10 | 1.45 | 4.85 |
| Withdrawal | .83 | 3.22 | 0.65 | 3.20 | 1.50 | 4.80 |
| Volatility | .88 | 2.95 | 0.72 | 2.90 | 1.30 | 5.00 |
| *Conscientiousness* | .82 | 3.19 | 0.45 | 3.20 | 1.70 | 4.30 |
| Industriousness | .80 | 2.96 | 0.55 | 3.00 | 1.30 | 4.20 |
| Orderliness | .78 | 3.42 | 0.58 | 3.40 | 1.40 | 4.90 |
| **MES** |  |  |  |  |  |  |
| *Moral Expansiveness* | .93 | 44.64 | 13.66 | 44.00 | 7.00 | 80.00 |

Sample F

| **Scale** | **Alpha** | **Mean** | ***SD*** | **Median** | **Min** | **Max** |
| --- | --- | --- | --- | --- | --- | --- |
| **EC Scale** |  |  |  |  |  |  |
| *Enlightened Compassion* | .84 | 3.87 | 0.61 | 3.92 | 1.67 | 5.00 |
| **BFAS** |  |  |  |  |  |  |
| *Agreeableness* | .88 | 3.89 | 0.51 | 3.90 | 1.75 | 4.80 |
| Compassion | .88 | 4.01 | 0.60 | 4.00 | 1.30 | 5.00 |
| Politeness | .79 | 3.76 | 0.59 | 3.80 | 1.40 | 4.90 |
| *Openness/Intellect* | .81 | 3.69 | 0.46 | 3.65 | 2.30 | 4.95 |
| Openness | .73 | 3.80 | 0.54 | 3.80 | 1.80 | 5.00 |
| Intellect | .83 | 3.59 | 0.60 | 3.60 | 1.90 | 5.00 |
| *Extraversion* | .88 | 3.37 | 0.55 | 3.40 | 1.75 | 4.90 |
| Enthusiasm | .86 | 3.50 | 0.68 | 3.55 | 1.60 | 5.00 |
| Assertiveness | .86 | 3.25 | 0.66 | 3.30 | 1.40 | 5.00 |
| *Neuroticism* | .90 | 2.94 | 0.63 | 2.90 | 1.20 | 4.75 |
| Withdrawal | .82 | 3.12 | 0.68 | 3.10 | 1.20 | 4.80 |
| Volatility | .89 | 2.76 | 0.75 | 2.70 | 1.00 | 4.70 |
| *Conscientiousness* | .82 | 3.31 | 0.48 | 3.30 | 1.95 | 4.65 |
| Industriousness | .81 | 3.06 | 0.61 | 3.00 | 1.60 | 4.70 |
| Orderliness | .75 | 3.57 | 0.55 | 3.60 | 1.80 | 4.90 |
| **MES** |  |  |  |  |  |  |
| *Moral Expansiveness* | .93 | 64.84 | 18.55 | 63.00 | 5.00 | 120.00 |
| **SDO7** |  |  |  |  |  |  |
| *Social Egalitarianism (Reversed)* | .89 | 2.73 | 0.98 | 2.75 | 1.00 | 5.69 |
| **Speciesism Scale** |  |  |  |  |  |  |
| *Species Egalitarianism (Reversed)* | .81 | 2.82 | 1.19 | 2.67 | 1.00 | 7.00 |
| **NEP** |  |  |  |  |  |  |
| *Ecological Egalitarianism* | .80 | 3.79 | 0.53 | 3.80 | 2.20 | 4.80 |

Sample G

| **Scale** | **Alpha** | **Mean** | ***SD*** | **Median** | **Min** | **Max** |
| --- | --- | --- | --- | --- | --- | --- |
| **EC Scale** |  |  |  |  |  |  |
| *Enlightened Compassion* | .88 | 3.69 | 0.78 | 3.83 | 1.33 | 5.00 |
| **BFAS** |  |  |  |  |  |  |
| *Agreeableness* | .89 | 3.74 | 0.64 | 3.75 | 1.85 | 5.00 |
| Compassion | .87 | 3.73 | 0.76 | 3.80 | 1.40 | 5.00 |
| Politeness | .80 | 3.75 | 0.69 | 3.80 | 1.90 | 5.00 |
| *Openness/Intellect* | .87 | 3.65 | 0.62 | 3.70 | 1.80 | 4.95 |
| Openness | .81 | 3.64 | 0.68 | 3.60 | 1.50 | 5.00 |
| Intellect | .86 | 3.66 | 0.77 | 3.70 | 1.30 | 5.00 |
| *Extraversion* | .90 | 3.17 | 0.71 | 3.15 | 1.05 | 4.85 |
| Enthusiasm | .84 | 3.21 | 0.76 | 3.20 | 1.00 | 5.00 |
| Assertiveness | .87 | 3.13 | 0.82 | 3.20 | 1.10 | 5.00 |
| *Neuroticism* | .94 | 2.71 | 0.84 | 2.70 | 1.00 | 4.85 |
| Withdrawal | .89 | 2.83 | 0.92 | 2.80 | 1.00 | 4.90 |
| Volatility | .90 | 2.58 | 0.88 | 2.60 | 1.00 | 4.90 |
| *Conscientiousness* | .87 | 3.58 | 0.60 | 3.60 | 2.00 | 5.00 |
| Industriousness | .85 | 3.56 | 0.74 | 3.60 | 1.60 | 5.00 |
| Orderliness | .82 | 3.60 | 0.70 | 3.50 | 1.30 | 5.00 |
| **MES** |  |  |  |  |  |  |
| *Moral Expansiveness* | .93 | 43.23 | 16.47 | 41.00 | 7.00 | 92.00 |
| **PVQ-5X** |  |  |  |  |  |  |
| *Universalism* | .91 | 4.47 | 1.05 | 4.62 | 1.00 | 6.00 |
| **IWAH** |  |  |  |  |  |  |
| *Identification with Humanity* | .91 | 27.10 | 7.56 | 27.00 | 9.00 | 44.00 |
| **Solidarity with Animals Scale** |  |  |  |  |  |  |
| *Identification with Animals* | .96 | 5.08 | 1.56 | 5.20 | 1.00 | 7.00 |
| **CNS** |  |  |  |  |  |  |
| *Identification with Nature* | .88 | 3.49 | 0.71 | 3.57 | 1.36 | 5.00 |
| **NPCD Task** |  |  |  |  |  |  |
| *Expansive Charitable Donation* | .98 | 6.00 | 7.32 | 2.25 | 0.00 | 29.00 |
| Foreign | - | 0.26 | 0.33 | 0.00 | 0.00 | 1.00 |
| Battlers | .91 | 0.79 | 1.08 | 0.00 | 0.00 | 4.00 |
| Afflicted | .92 | 0.96 | 1.18 | 0.25 | 0.00 | 4.00 |
| Marginalised | .93 | 0.72 | 1.07 | 0.00 | 0.00 | 4.00 |
| Stigmatised | .91 | 0.81 | 1.06 | 0.25 | 0.00 | 4.00 |
| Non-Human | .94 | 0.97 | 1.23 | 0.25 | 0.00 | 4.00 |
| Non-Sentient | .93 | 0.87 | 1.14 | 0.25 | 0.00 | 4.00 |
| Non-Natural | .91 | 0.62 | 0.97 | 0.00 | 0.00 | 4.00 |

Power Analyses

Sample A

| **Studies 1 to 3**  **Bivariate Correlations** (*N = 774, alpha = .05*) | |
| --- | --- |
| *Power to Detect*  *r = .20* | *Minimum Detectable r*  *at 80% Power* |
| 99% | .10 |

| **Study 1**  **EFA** (*of reduced Enlightened Compassion item pool*) | | |
| --- | --- | --- |
| ***N:i*** | *N* | *No. of Items (i)* |
| **40.74** | 774 | 19 |

Sample B

| **Studies 1 to 3**  **Bivariate Correlations** (*N = 414, alpha = .05*) | |
| --- | --- |
| *Power to Detect*  *r = .20* | *Minimum Detectable r*  *at 80% Power* |
| 98% | .14 |

| **Study 1**  **CFA** (*of EC Scale*) | | |
| --- | --- | --- |
| ***N:i*** | *N* | *No. of Items (i)* |
| **34.50** | 414 | 12 |

Sample C

| **Studies 1 to 3**  **Bivariate Correlations** (*N = 260, alpha = .05*) | |
| --- | --- |
| *Power to Detect*  *r = .20* | *Minimum Detectable r*  *at 80% Power* |
| 90% | .17 |

Sample D

| **Studies 1 to 3**  **Bivariate Correlations** (*N = 190, alpha = .05*) | |
| --- | --- |
| *Power to Detect*  *r = .20* | *Minimum Detectable r*  *at 80% Power* |
| 79% | .20 |

Sample E

| **Studies 1 to 3**  **Bivariate Correlations** (*N = 278, alpha = .05*) | |
| --- | --- |
| *Power to Detect*  *r = .20* | *Minimum Detectable r*  *at 80% Power* |
| 92% | .17 |

Sample F

| **Studies 1 to 3**  **Bivariate Correlations** (*N = 389, alpha = .05*) | |
| --- | --- |
| *Power to Detect*  *r = .20* | *Minimum Detectable r*  *at 80% Power* |
| 98% | .14 |

Sample G

| **Studies 1 to 3**  **Bivariate Correlations** (*N = 217, alpha = .05*) | |
| --- | --- |
| *Power to Detect*  *r = .20* | *Minimum Detectable r*  *at 80% Power* |
| 84% | .19 |

Study 1

Divergence from Non-Focal B5 Aspects

| *Divergence between Enlightened Compassion and Nonfocal B5 Aspects (Samples A to G)* | |
| --- | --- |
| Trait | Sample-weighted average correlation |
| *Agreeableness* | .51 |
| **Compassion** | **.57** |
| Politeness | .30 |
| *Openness/Intellect* | .53 |
| **Openness** | **.57** |
| Intellect | .30 |
| *Extraversion* | .32 |
| Enthusiasm | .31 |
| Assertiveness | .23 |
| *Neuroticism* | -.04 |
| Withdrawal | -.00 |
| Volatility | -.06 |
| *Conscientiousness* | .13 |
| Industriousness | .11 |
| Orderliness | .10 |
| *Note*. *N*s = 774 (Sample A), 414 (Sample B), 260 (Sample C), 190 (Sample D), 278 (Sample E), 389 (Sample F), and 217 (Sample G). Results for Compassion and Openness are included for comparison in bold. | |

| *Semipartial Correlations between Enlightened Compassion and Select B5 Aspects (Samples A to G)* | | | | | | | |
| --- | --- | --- | --- | --- | --- | --- | --- |
|  | Sample | | | | | | |
| Traits | A | B | C | D | E | F | G |
| Compassion, *Politeness* | **.55***** | **.41***** | **.42***** | **.38***** | **.46***** | **.50***** | **.60***** |
| Politeness, *Compassion* | .06* | .03 | .09 | .09 | .03 | .03 | -.13 |
|  |  |  |  |  |  |  |  |
| Openness, *Intellect* | **.50***** | **.47***** | **.54***** | **.51***** | **.48***** | **.51***** | **.48***** |
| Intellect, *Openness* | .12*** | .05 | .08 | .00 | .16** | .14*** | .18*** |
|  |  |  |  |  |  |  |  |
| Compassion, *Enthusiasm* | **.51***** | **.40***** | **.41***** | **.42***** | **.49***** | **.54***** | **.52***** |
| Enthusiasm, *Compassion* | .11** | .01 | .08 | .01 | -.01 | -.05 | .09 |
| *Note*. *N*s = 774 (Sample A), 414 (Sample B), 260 (Sample C), 190 (Sample D), 278 (Sample E), 389 (Sample F), and 217 (Sample G). For each semipartial correlation, the control variable is italicised. Results for Compassion and Openness are bolded.  **p* < .050, two-tailed. ***p* < .010, two-tailed. ****p* < .001, two-tailed. | | | | | | | |

Convergence with BFI-2 and HEXACO-100 Traits

Enlightened compassion correlated strongly (.38 < *r* < .58) and significantly with the closest analogues of Compassion (i.e., BFI-2 Compassion, HEXACO Altruism, and HEXACO Sentimentality) and strongly (.35 < *r* < .46) and significantly with the closest analogues of Openness (i.e., BFI-2 Openness/Intellect subscales and HEXACO Openness to Experience facets) from the BFI-2 and HEXACO-100. HEXACO Honesty-Humility also converged with enlightened compassion to a smaller degree (sample-weighted average *r* = .27). Such convergence was unsurprising given Honesty-Humility explicitly describes individual differences in morally relevant tendencies (Ashton et al., 2004). That said, the magnitude of the convergence implies that enlightened compassion is distinguishable from Honesty-Humility. One interpretation of this finding is that the latter may be more apt to describe norm or rule based prosociality (Zhao, Ferguson, & Smillie, 2017) as opposed to the more flexible and inclusive form that characterises enlightened compassion.

| *Convergence between Enlightened Compassion and Select BFI-2 or HEXACO-100 Traits (Samples A to F)* | |
| --- | --- |
| Trait | Correlation |
| *BFI-2 Agreeableness*a | .56*** |
| Compassiona | **.56***** |
| Respectfulnessa | .36*** |
| Trusta | .42*** |
| *BFI-2 Openness/Intellect*a | .53*** |
| Aesthetic Sensitivitya | **.46***** |
| Creative Imaginationa | **.40***** |
| Intellectual Curiositya | **.43***** |
| *HEXACO Altruism*b | **.58** |
| *HEXACO Sentimentality* c | **.38***** |
| *HEXACO Openness to Experience*c | .53*** |
| Aesthetic Appreciationc | **.35***** |
| Creativityc | **.44***** |
| Unconventionalityc | **.41***** |
| Inquisitivenessc | .31*** |
| *HEXACO Agreeableness*c | .18** |
| *HEXACO Honesty-Humility*b | .27 |
| *Note*. *N*s = 774 (Sample A), 414 (Sample B), 260 (Sample C), 190 (Sample D), 278 (Sample E), 389 (Sample F). Results for analogues of Compassion and Openness—i.e., subscales correlated ~*r* > .50 with Compassion or Openness in previous studies (Ludeke et al., 2019; Soto & John, 2017)—are bolded. HEXACO Altruism and HEXACO Honesty-Humility were measured in multiple samples and are hence reported as sample-weighted averages; other BFI-2 and HEXACO-100 traits were only measured in one sample and are hence reported as raw correlations.  aMeasured in Sample A only.  bSample-weighted average correlation across Samples A to F. Raw correlations were significant within each sample at *p* < .001.  cMeasured in Sample F only, and only for a portion (*n* = 215) of the sample.  **p* < .050, two-tailed. ***p* < .010, two-tailed. ****p* < .001, two-tailed. | |

Study 2

In addition to the focal trait correlates reported in the main manuscript, we measured some additional constructs that are broadly relevant to enlightened compassion:

Additional Correlates of Enlightened Compassion: Established Scales

- **Anthropomorphism**, *Individual Differences in Anthropomorphism Questionnaire* (IDAQ; Waytz et al., 2010)
  - Sample E
  - Measures the tendency to attribute humanlike qualities to nonhuman entities (e.g., “To what extent does the average robot have consciousness?”).
- **Awe**, *Dispositional Positive Emotion Scales* (DPES; Shiota et al., 2006)
  - Sample F
  - Measures the tendency to experience awe (e.g., “I feel wonder almost every day”).
- **Awe**, *Awe Experience Scale* (AWE-S; Yaden et al., 2019)
  - Sample F
  - Measures momentary self-transcendent experiences of vastness, self-diminishment, connectedness, and a need for accommodation (i.e., state awe). We adapted the AWE-S to assess the regularity of such awe experiences (i.e., trait awe) by adding the phrase “How often do you...” to the beginning of each item (e.g., “…experience something greater than yourself?”).
- **Benevolence**, *Portrait Values Questionnaire 5X* (PVQ-5X; Schwartz et al., 2012)
  - Samples D, G
  - Measures the degree to which one endorses concern for close acquaintances as a guiding principle (e.g., “Caring for the well-being of people he/she is close to is important to him/her”).
- **Dark Triad**, *Dirty Dozen* (Jonason & Webster, 2010)
  - Samples A to D
  - Measures the tendency to engage in short-term, agentic, exploitive social strategies (e.g., “I tend to manipulate others to get my way”).
- **Empathy**, *Questionnaire of Cognitive and Affective Empathy* (QCAE; Reniers, Corcoran, Drake, Shryane, & Völlm, 2011)
  - Sample E
  - Measures the tendency to self-transcend through resonating with and comprehending others’ emotions. The affective empathy subscale assesses the tendency to vicariously experience others’ emotions (e.g., “I get very upset when I see someone cry”). The cognitive empathy subscale assesses the tendency to read others’ emotions (e.g., “I find it easy to put myself in somebody else’s shoes”).
- **Intellectual Humility**, *Intellectual Humility Scale* (IH Scale; Leary et al., 2017)
  - Samples B to C
  - Measures the tendency to adjust one’s personal beliefs based on the ability to access and understand relevant evidence (e.g., “In the face of conflicting evidence, I am open to changing my opinions”).
- **Social Mindfulness**, *Social Mindfulness Paradigm* (SoMi; Van Doesum et al., 2013)
  - Samples A, C
  - Measures the preference for preserving others’ autonomy in interdependent decision-making contexts.
- **Speciesism** (Piazza et al., 2015)
  - Samples D, F
  - Ad-hoc item set measuring the tendency to elevate human interests over equivalent animal interests (e.g., “We should always elevate human interests over the interests of animals”). In the main manuscript, we only report results for speciesism using the Speciesism Scale, which is a validated measure.

Additional Correlates of Enlightened Compassion: Novel Items

- **General Prosocial Behaviours**
  - Samples A to G
  - Participants self-reported the frequency with which they performed *volunteering*, *charitable donation*, and *blood donation* within the previous year by rating each behaviour either 1 (*0 times*), 2 (1-2 *times*), 3 (*3-5 times*), 4 (*6-10 times*), or 5 (*More than 10 times*). Participants also self-reported whether they are on the *organ donor register* by responding either 0 (*No*) or 1 (*Yes*).
- **Vegetarianism**
  - Samples D to G
  - Participants self-reported their conformity to *vegetarianism* by responding to two statements: a) “Please describe your diet using the following continuum, ranging from 10 = vegan (a person who eats vegetables, fruits, and grains but no animal, seafood, or fish products) to 1 = omnivore (a person who eats vegetables, fruits, grains, and most animal products)”, and b) “The food I eat is all, or almost all, vegetarian”, from 1 (*strongly disagree*) to 5 (*strongly agree*).
- **Self-Other Distance Perceptions**
  - Sample E
  - Participants self-reported the perceived distance between themselves and seven entities: “Members of Your Family”, “Your Friends”, “People from Your Country”, “People in Other Countries”, “Animals”, “The Environment”, and “Artistic and Historical Artefacts”. Participants rated each entity on a scale from 1 (*very close to me*) to 7 (*very far from me*) in terms of *social distance* (“do you regularly interact withthese entities?”), *psychological distance* (are yourthoughts, feelings, and behaviours similartothese entities?”), biological distance (“are you physicallysimilar to these entities?”), and *geographical distance* (“do you live near these entities?”).

| *Additional Correlates of Enlightened Compassion (Samples A to G)* | | | | | | | |
| --- | --- | --- | --- | --- | --- | --- | --- |
| Correlate | Sample A | Sample B | Sample C | Sample D | Sample E | Sample F | Sample G |
| Anthropomorphism |  |  |  |  | .19** |  |  |
| Awe (DPES) |  |  |  |  |  | .54*** |  |
| Awe (AWE-S) |  |  |  |  |  | .38*** |  |
| Benevolence |  |  |  | .40*** |  |  | .53*** |
| Dark Triad | -.30*** | -.24*** | -.37*** | -.34*** |  |  |  |
| Empathy (Affective) |  |  |  |  | .49*** |  |  |
| Empathy (Cognitive) |  |  |  |  | .59*** |  |  |
| Intellectual Humility |  | .28*** | .24*** |  |  |  |  |
| Social Mindfulness | .11** |  | .10 |  |  |  |  |
| Speciesism |  |  |  | -.27*** |  | -.30*** |  |
| Volunteering | .25*** | .28*** | .17** | .29*** | .24*** | .21*** | .07 |
| Charitable donation | .23*** | .17*** | .17** | .28** | .30*** | .25*** | .27*** |
| Blood donation | .08* | .14** | -.01 | .18* | .09 | .07 | -.00 |
| Organ donor register | .03 | .13* | .00 | .10 | .20*** | .17*** | .18** |
| Vegetarianism (a) |  |  |  | .24*** | .17** | .33*** | .05 |
| Vegetarianism (b) |  |  |  | .24*** | .17** | .35*** | .15* |
| *Note*. *N*s = 774 (Sample A), 414 (Sample B), 260 (Sample C), 190 (Sample D), 278 (Sample E), 389 (Sample F), and 217 (Sample G). Scales were only administered to a portion of Sample F for speciesism (*n* = 215) and awe (*n* = 215).  **p* < .050, two-tailed. ***p* < .010, two-tailed. ****p* < .001, two-tailed. | | | | | | | |

| *Correlation between Enlightened Compassion and Self-Other Distance Perceptions (Sample E)* | | | | |
| --- | --- | --- | --- | --- |
|  | Social | Psychological | Biological | Geographical |
| Members of Your Family | -.11 | -.11 | -.08 | -.15* |
| Your Friends | -.26*** | -.17** | -.02 | -.09 |
| People from Your Country | -.20*** | -.11 | -.17** | -.10 |
| People in Other Countries | -.26*** | -.28*** | -.21*** | .01 |
| Animals | -.32*** | -.30*** | -.12 | -.31*** |
| The Environment | -.32*** | -.31*** | -.04 | -.29*** |
| Artistic and Historical Artefacts | -.26*** | -.18** | .03 | -.29*** |
| *Note*. *N* = 278 (Sample E).  **p* < .050, two-tailed. ***p* < .010, two-tailed. ****p* < .001, two-tailed. | | | | |

Unique Links between B5 Aspects and Correlates of Enlightened Compassion

| *Semi-Partial Correlations between Focal B5 Aspects and the Correlates of Enlightened Compassion (Samples A to G)* | | | | | | |
| --- | --- | --- | --- | --- | --- | --- |
|  | B5 aspects | | | | | |
| Correlate | C, *O* | O, *C* | C, *P* | P, *C* | O, *I* | I, *O* |
| Moral imagination |  |  |  |  |  |  |
| Sample A | .27*** | .14*** | .36*** | -.07* | .24*** | .06 |
| Sample B | .13** | .25*** | .20*** | .02 | .31*** | -.05 |
| Sample C | .19** | .28*** | .36*** | -.10 | .33*** | .07 |
| Moral expansiveness |  |  |  |  |  |  |
| Sample A | .11** | .16*** | .15*** | .04 | .23*** | -.04 |
| Sample C | .09 | .26*** | .19** | .04 | .30*** | .00 |
| Sample E | .20** | .08 | .21*** | .01 | .17** | -.00 |
| Sample F | .19** | .20** | .22** | .05 | .28*** | .00 |
| Sample G | .33*** | .13* | .35*** | .02 | .26*** | .07 |
| Universalism |  |  |  |  |  |  |
| Sample D | .23*** | .35*** | .23** | .19** | .44*** | -.06 |
| Sample G | .29*** | .29*** | .41*** | -.01 | .40*** | .09 |
| Social egalitarianism |  |  |  |  |  |  |
| Sample D | .40*** | .12 | .32*** | .18** | .24** | .00 |
| Sample F | .28*** | .11* | .20*** | .21*** | .20*** | .08 |
| Species egalitarianism |  |  |  |  |  |  |
| Sample D | .18* | .06 | .08 | .24** | .14* | -.13 |
| Sample F | .22** | .21** | .18** | .22** | .31*** | .05 |
| Ecological egalitarianism |  |  |  |  |  |  |
| Sample D | .25*** | .04 | .20** | .11 | .12 | .00 |
| Sample F | .19** | .23*** | .16* | .19** | .30*** | .02 |
| Identification with humanity |  |  |  |  |  |  |
| Sample G | .13 | .16* | .32*** | -.22** | .27*** | -.08 |
| Identification with animals |  |  |  |  |  |  |
| Sample G | .03 | .34*** | .20** | -.03 | .36*** | .01 |
| Identification with nature |  |  |  |  |  |  |
| Sample G | .10 | .40*** | .33*** | -.09 | .41*** | .09 |
| Note. Ns = 774 (Sample A), 414 (Sample B), 260 (Sample C), 190 (Sample D), 278 (Sample E), 389 (Sample F), and 217 (Sample G). For each semipartial correlation, the control variable is italicised. “C” = Compassion. “O” = Openness. “P” = Politeness. “I” = Intellect.  *p < .050, two-tailed. **p < .010, two-tailed. ***p < .001, two-tailed. | | | | | | |

Study 3

NPCD Task: Associations Among Charitable Causes

The 29 charitable causes in the NPCD Task were strongly intercorrelated (for simplicity, intercorrelations are reported below at level of conceptual charitable cause categories rather than individual charitable causes). Parallel analysis and examination of the corresponding scree plot suggested that the 29 charitable causes could accordingly be reduced to two factors. After extracting two factors from an EFA using maximum likelihood estimation and applying direct oblimin rotation, the pattern of factor loadings suggested that Factor 1 was indicated by charities supporting human or manmade targets, while Factor 2 was indicated by charities supporting animal or environmental nonhuman targets.

| *Spearman Intercorrelations among Charitable Cause Categories in the NPCD Task (Sample G)* | | | | | | | | |
| --- | --- | --- | --- | --- | --- | --- | --- | --- |
| Conceptual category | 1 | 2 | 3 | 4 | 5 | 6 | 7 | 8 |
| 1. Foreign | - |  |  |  |  |  |  |  |
| 2. Afflicted | .87*** | - |  |  |  |  |  |  |
| 3. Battlers | .80*** | .89*** | - |  |  |  |  |  |
| 4. Marginalised | .82*** | .87*** | .84*** | - |  |  |  |  |
| 5. Stigmatised | .86*** | .88*** | .81*** | .89*** | - |  |  |  |
| 6. Non-Human | .75*** | .80*** | .76*** | .75*** | .78*** | - |  |  |
| 7. Non-Sentient | .82*** | .86*** | .79*** | .84*** | .83*** | .88*** | - |  |
| 8. Non-Natural | .75*** | .85*** | .86*** | .83*** | .78*** | .76*** | .85*** | - |
| *Note*. *N* = 217 (Sample G).  **p* < .050, two-tailed. ***p* < .010, two-tailed. ****p* < .001, two-tailed. | | | | | | | | |


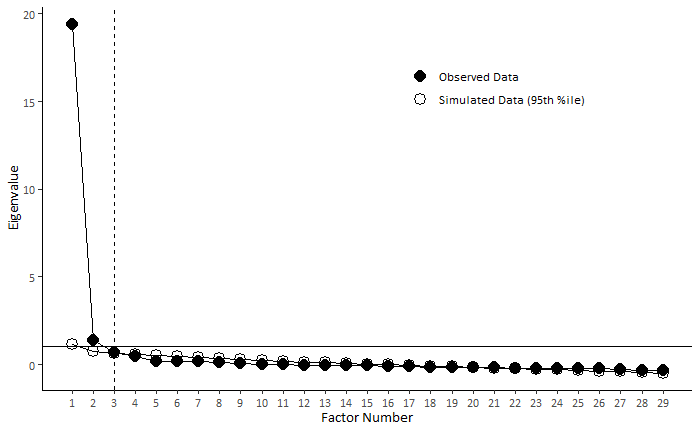


| *Empirical Structure of Charitable Causes in the NPCD Task (Sample G)* | | | |
| --- | --- | --- | --- |
|  |  | Loading on EFA factor | |
| Conceptual category | Charitable cause | Factor 1 | Factor 2 |
| *Foreign* | People living in poverty | .68 |  |
|  |  |  |
| *Battlers* | Military personnel | .90 |  |
| Emergency service workers | .88 |  |
| Farmers | .86 |  |
| Seniors | .77 |  |
|  |  |  |
| *Afflicted* | Cancer patients | .79 |  |
| Foster children | .71 |  |
| Disaster victims | .83 |  |
| People with disabilities | .78 |  |
|  |  |  |
| *Marginalised* | LGBT+ people | .89 |  |
| African Americans | .96 |  |
| Women | .78 |  |
| Muslims | .93 |  |
|  |  |  |
| *Stigmatised* | People with mental illness | .76 |  |
| Homeless people | .70 |  |
| Refugees | .86 |  |
| People with substance dependence | .85 |  |
|  |  |  |
| *Non-Human* | Companion animals |  | .92 |
| Farmed animals |  | .75 |
| Wild animals |  | .88 |
| Captive animals |  | .98 |
|  |  |  |
| *Non-Sentient* | The planet |  | .61 |
| Oceans |  | .70 |
| Forests | .34 | .60 |
| Natural landmarks | .67 |  |
|  |  |  |
| *Non-Natural* | Sacred artifacts | .79 |  |
| Heritage icons | .80 |  |
| Artistic creations | .62 |  |
| Scientific works | .61 |  |
|  |  |  |
| *Note*. *N* = 217 (Sample G). Loadings < .30 are not reported. | | | |

NPCD Task: Associations with Individual Charitable Causes

| *Correlation between Enlightened Compassion and each Charitable Cause in the NPCD Task (Sample G)* | | | |
| --- | --- | --- | --- |
| Conceptual category | Charitable cause | Spearman correlation | |
| *Foreign* | People living in poverty | .18** | |
|  |  | |
| *Battlers* | Military personnel | .17* | |
| Emergency service workers | .14* | |
| Farmers | .15* | |
| Seniors | .16* | |
|  |  | |
| *Afflicted* | Cancer patients | .14* | |
| Foster children | .20** | |
| Disaster victims | .15* | |
| People with disabilities | .14* | |
|  |  | |
| *Marginalised* | LGBT+ people | .22** | |
| African Americans | .23*** | |
| Women | .21** | |
| Muslims | .19** | |
|  |  | |
| *Stigmatised* | People with mental illness | .21** | |
| Homeless people | .23*** | |
| Refugees | .26*** | |
| People with substance dependence | .22** | |
|  |  | |
| *Non-Human* | Companion animals | .14* | |
| Farmed animals | .16* | |
| Wild animals | .18** | |
| Captive animals | .12 | |
|  |  | |
| *Non-Sentient* | The planet | .19** | |
| Oceans | .22** | |
| Forests | .20** | |
| Natural landmarks | .26*** | |
|  |  | |
| *Non-Natural* | Sacred artifacts | .20** | |
| Heritage icons | .17* | |
| Artistic creations | .20** | |
| Scientific works | .15* | |
|  |  |  |
| *Note*. *N* = 217 (Sample G).  **p* < .050, two-tailed. ***p* < .010, two-tailed. ****p* < .001, two-tailed. | | | |

NPCD Task: Analyses for Compassion and Openness

| *Semipartial Correlations for Compassion and Openness in the NPCD Task (Sample G)* | | | |
| --- | --- | --- | --- |
|  |  | Semipartial correlation | |
| Conceptual category | Charitable cause | *Comp* (Open)a | *Open* (Comp)b |
| *Foreign* | People living in poverty | .03  🗶 | .05  ⊖ |
|  |  |  |
| *Battlers* | Military personnel | .08  🗶 | -.00  ⊖ |
| Emergency service workers |
| Farmers |
| Seniors |
|  |  |  |
| *Afflicted* | Cancer patients | .03  🗶 | .10  ⊖ |
| Foster children |
| Disaster victims |
| People with disabilities |
|  |  |  |
| *Marginalised* | LGBT+ people | .03  🗶 | .06  ⊖ |
| African Americans |
| Women |
| Muslims |
|  |  |  |
| *Stigmatised* | People with mental illness | .08  🗶 | .07  ⊖ |
| Homeless people |
| Refugees |
| People with substance dependence |
|  |  |  |
| *Non-Human* | Companion animals | -.04  ⊖ | .13  🗶 |
| Farmed animals |
| Wild animals |
| Captive animals |
|  |  |  |
| *Non-Sentient* | The planet | .01  ⊖ | .11  🗶 |
| Oceans |
| Forests |
| Natural landmarks |
|  |  |  |
| *Non-Natural* | Sacred artifacts | .00  ⊖ | .09  🗶 |
| Heritage icons |
| Artistic creations |
| Scientific works |
|  |  |  |
| **Overall** | **Expansive charitable donation** | **.03**  **🗶** | **.09**  **🗶** |
| *Note*. *N* = 217 (Sample G). Cells with preregistered hypotheses are indicated as: ✓ = Hypothesised positive correlation, prediction supported; 🗶 = Hypothesised positive correlation, prediction not supported; ⊖ = Hypothesised no correlation.  aSemipartial correlation for Compassion, controlling for Openness.  bSemipartial correlation for Openness, controlling for Compassion.  **p* < .050, two-tailed. ***p* < .010, two-tailed. ****p* < .001, two-tailed. | | | |

NPCD Task: Pilot Version

In Sample E, we piloted a more basic version of the Non-Parochial Charitable Donation Task. In this pilot version, participants were given the following instructions (NB: no deception was used):


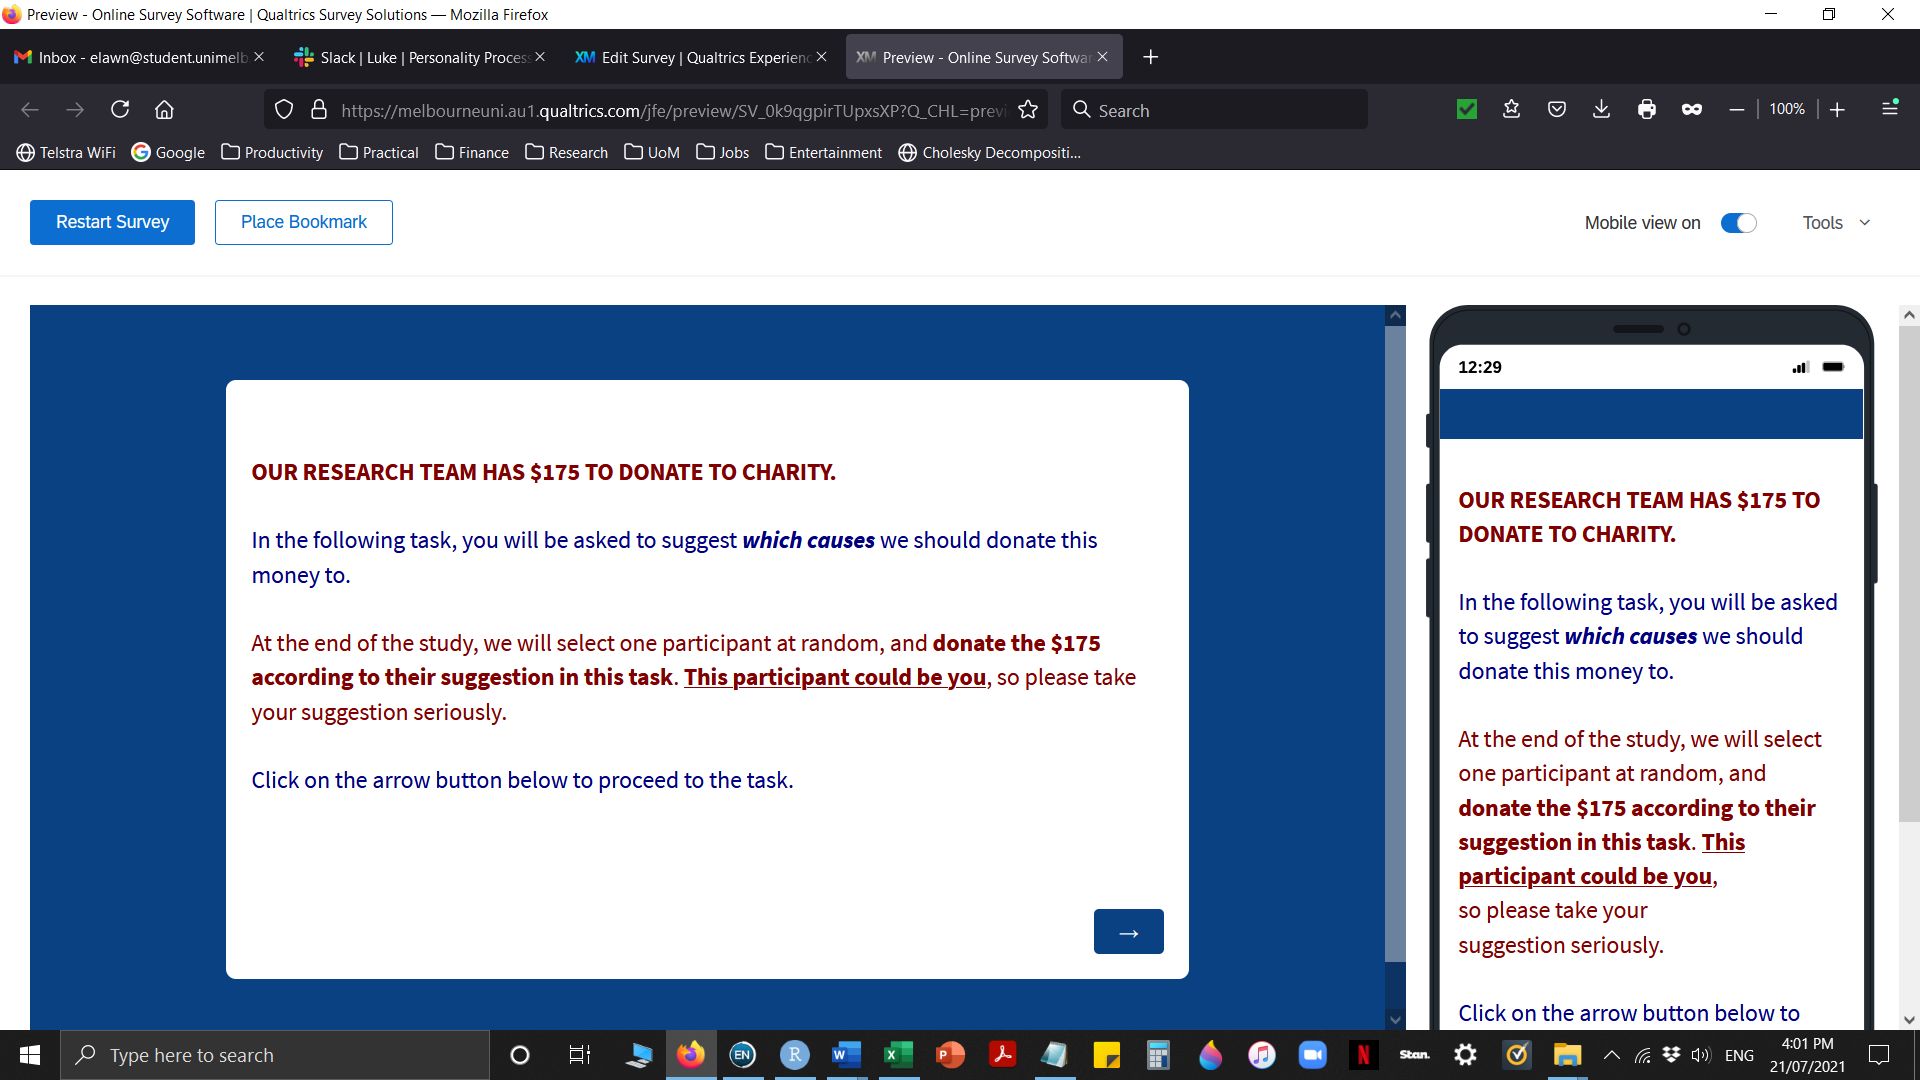


After proceeding to the task, participants were asked to select one of three charitable donation portfolios: (1) a human biased portfolio, (2) a nonhuman biased portfolio, or (3) a mixed (human and nonhuman balanced) portfolio. These portfolios are shown below. We expected that individuals higher in enlightened compassion would be more likely to donate to the mixed charity portfolio than the human biased or nonhuman biased charity portfolios. We found that the odds of choosing the human biased or nonhuman biased portfolio relative to the mixed portfolio decreased as enlightened compassion increased, but these odds ratios were not significant.


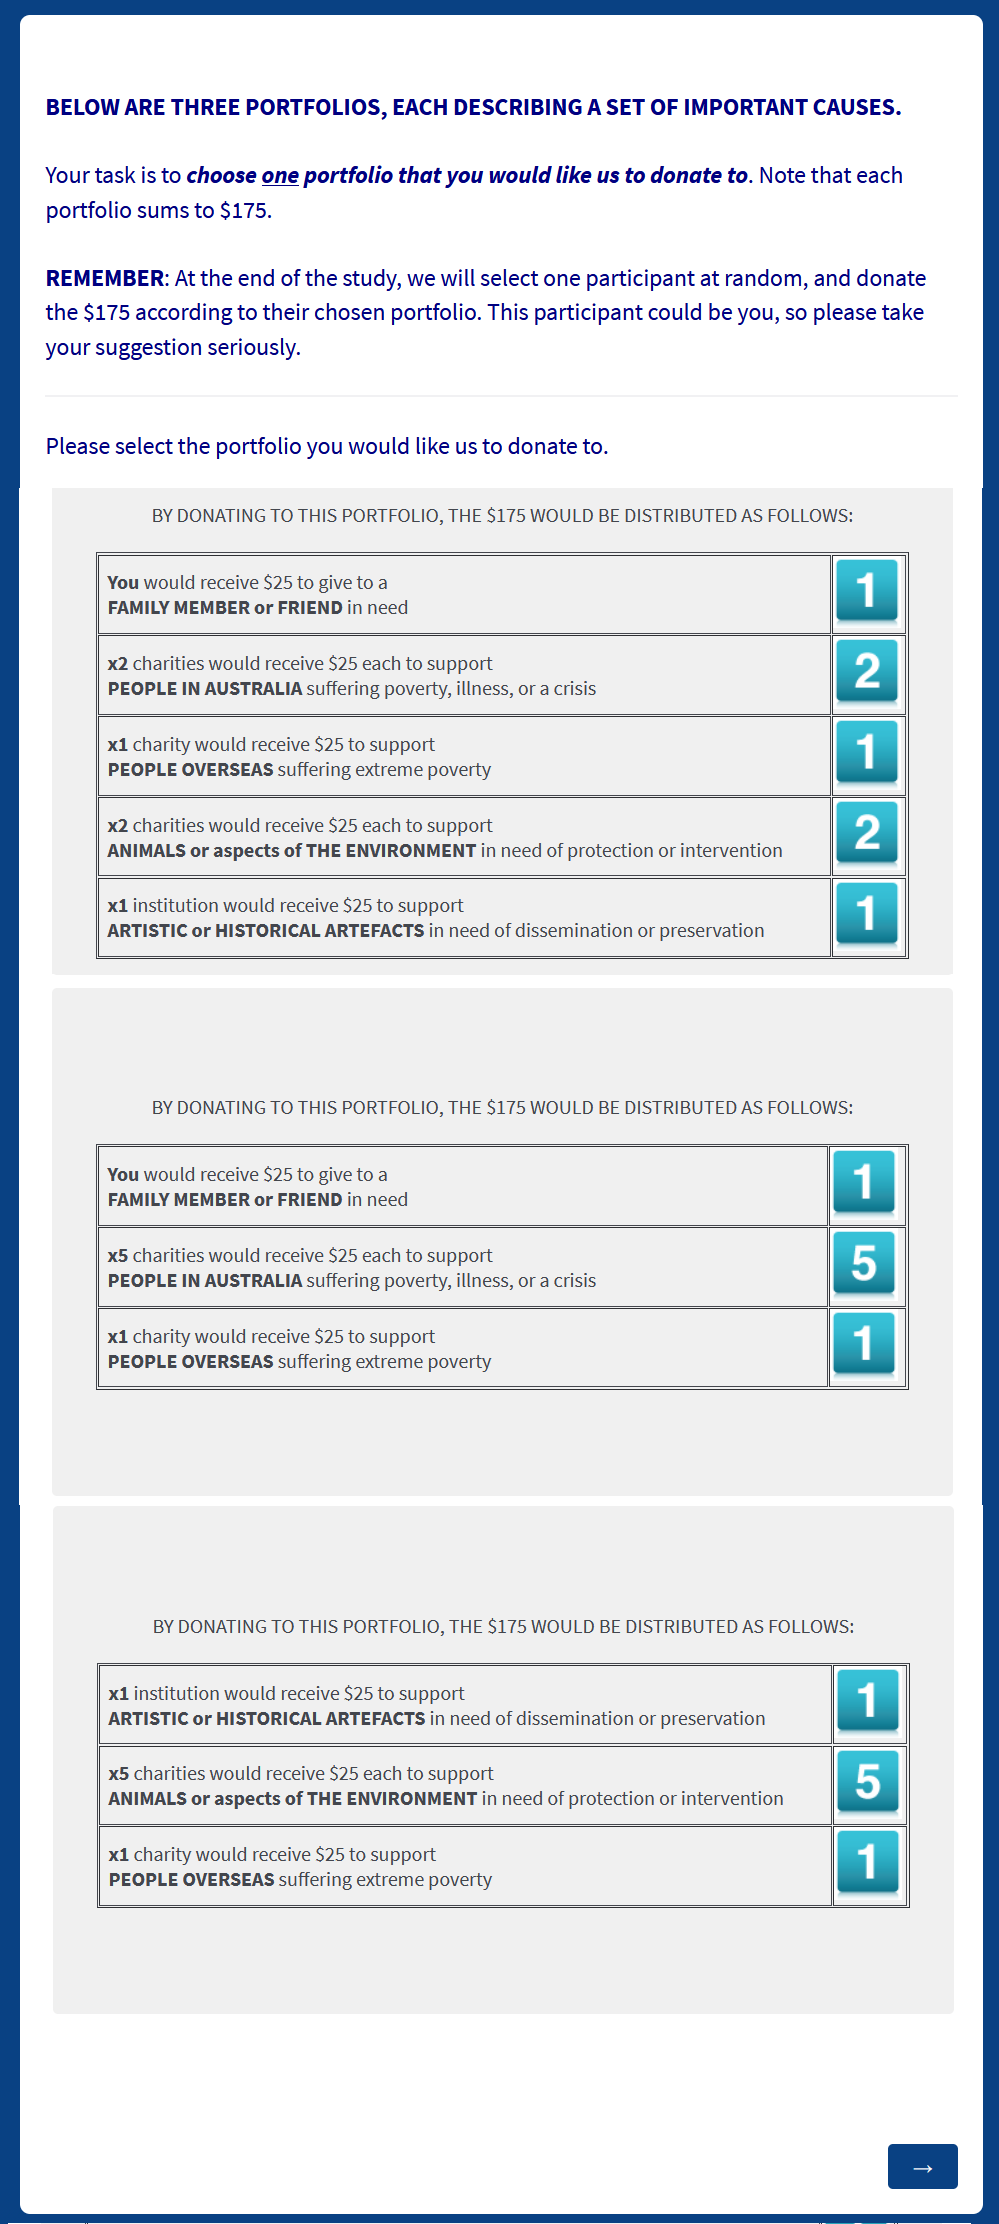


| *Pilot Version of NPCD Task (Sample E)* | | |
| --- | --- | --- |
|  | Exponentiated bivariate multinomial logistic regression coefficient when predicting donation portfolio | |
| Odds ratio | *p* value |
| Enlightened compassion |  |  |
| Human biased portfolio | 0.76 | .092 |
| Nonhuman biased portfolio | 0.94 | .677 |
| *Note*. *N* = 278 (Sample E).  Each odds ratio indicates the increase in odds of choosing the corresponding portfolio (vs. mixed portfolio) for every 1-unit increase in enlightened compassion. Odds ratios below (above) 1 indicate that the odds of choosing the corresponding portfolio relative to the mixed portfolio decrease (increase) as enlightened compassion increases. | | |

Appendix A

Enthusiasm

We replicate previous work by DeYoung et al. (2013) below by showing that Compassion and Enthusiasm (as measured by the BFAS) are robustly correlated:

| *Enthusiasm’s Correlations with Compassion and Openness (Samples A to G)* | | | | | | | |
| --- | --- | --- | --- | --- | --- | --- | --- |
|  | Sample | | | | | | |
| Trait | A | B | C | D | E | F | G |
| Compassion | .49*** | .45*** | .57*** | .44*** | .47*** | .48*** | .48*** |
| Openness | .18*** | .05 | .30*** | .15* | .03 | .06 | .44*** |
| *Note. N*s = 774 (Sample A), 414 (Sample B), 260 (Sample C), 190 (Sample D), 278 (Sample E), 389 (Sample F), and 217 (Sample G).  **p* < .050, two-tailed. ***p* < .010, two-tailed. ****p* < .001, two-tailed. | | | | | | | |

References

Ashton, M. C., Lee, K., Perugini, M., Szarota, P., de Vries, R. E., Di Blas, L., . . . de Raad, B. (2004). A six-factor structure of personality-descriptive adjectives: Solutions from psycholexical studies in seven languages. Journal of Personality and Social Psychology, 86(2), 356-366. doi: 10.1037/0022-3514.86.2.356

DeYoung, C. G., Weisberg, Y. J., Quilty, L. C., & Peterson, J. B. (2013). Unifying the aspects of the big five, the interpersonal circumplex, and trait affiliation. Journal of Personality, 81(5), 465-475. doi:10.1111/jopy.12020

Jonason, P. K., & Webster, G. D. (2010). The dirty dozen: A concise measure of the dark triad. Psychological Assessment, 22(2), 420-432. doi:10.1037/a0019265

Reniers, R. L. E. P., Corcoran, R., Drake, R., Shryane, N. M., & Völlm, B. A. (2011). The QCAE: A questionnaire of cognitive and affective empathy. Journal of Personality Assessment, 93(1), 84-95. doi: 10.1080/00223891.2010.528484

Schwartz, S. H., Cieciuch, J., Vecchione, M., Davidov, E., Fischer, R., Beierlein, C., . . . Konty, M. (2012). Refining the theory of basic individual values. Journal of Personality and Social Psychology, 103(4), 663-688. doi: 10.1037/a0029393

Shiota, M. N., Keltner, D., & John, O. P. (2006). Positive emotion dispositions differentially associated with big five personality and attachment style. The Journal of Positive Psychology, 1(2), 61-71. doi:10.1080/17439760500510833

Van Doesum, N. J., Van Lange, D. A. W., & Van Lange, P. A. M. (2013). Social mindfulness: Skill and will to navigate the social world. Journal of Personality and Social Psychology, 105(1), 86-103. doi:10.1037/a0032540

Waytz, A., Cacioppo, J., & Epley, N. (2010). Who sees human?: The stability and importance of individual differences in anthropomorphism. Perspectives on Psychological Science, 5(3), 219-232. doi:10.1177/1745691610369336

Yaden, D. B., Kaufman, S. B., Hyde, E., Chirico, A., Gaggioli, A., Zhang, J. W., & Keltner, D. (2019). The development of the awe experience scale (AWE-S): A multifactorial measure for a complex emotion. The Journal of Positive Psychology, 14(4), 474-488. doi: 10.1080/17439760.2018.1484940

Zhao, K., Ferguson, E., & Smillie, L. D. (2017). When fair is not equal: Compassion and politeness predict allocations of wealth under different norms of equity and need. Social Psychological and Personality Science, 8(8), 847-857. doi: 10.1177/1948550616683018
